# Supplementary material
Source: Research Square preprint supplement (doi:10.21203/rs.3.rs-9724593/v1)
Supplement: Supplementary file 2 [file fc760c6606cced75594834df.docx]

**Table S1. Multivariable Fine–Gray analyses for prostate cancer-specific and non-prostate cancer death in patients aged ≥75 and ≥80 years.**

| **Age subgroup** | **Outcome** | **Variable** | **sHR (95% CI)** | **P value** | **Outcome** | **sHR (95% CI)** | **P value** |
| --- | --- | --- | --- | --- | --- | --- | --- |
| ≥75 years | PC death | Upfront treatment | 0.62 (0.43–0.90) | 0.01 | Non-PC death | 1.08 (0.65–1.79) | 0.76 |
|  |  | Age, years | 1.04 (0.98–1.09) | 0.18 |  | 1.06 (1.01–1.12) | 0.02 |
|  |  | ECOG PS (0-4) | 0.90 (0.72–1.12) | 0.35 |  | 1.33 (1.05–1.69) | 0.02 |
|  |  | Total Gleason score | 1.16 (0.89–1.53) | 0.27 |  | 1.06 (0.79–1.42) | 0.71 |
|  |  | Bone metastases | 0.59 (0.24–1.42) | 0.24 |  | 0.78 (0.35–1.76) | 0.55 |
|  |  | Lymph node metastases | 1.19 (0.84–1.68) | 0.33 |  | 1.32 (0.83–2.09) | 0.24 |
|  |  | Lung metastases | 0.74 (0.43–1.30) | 0.30 |  | 1.62 (0.88–2.99) | 0.12 |
|  |  | Liver metastases | 2.30 (0.86–6.19) | 0.10 |  | 1.19 (0.28–5.12) | 0.81 |
|  |  | EOD (0-4) | 1.37 (1.12–1.69) | 0.003 |  | 0.85 (0.65–1.12) | 0.26 |
|  |  | CHAARTED high volume | 2.19 (1.12–4.29) | 0.02 |  | 0.92 (0.46–1.83) | 0.81 |
|  |  | PSA, ng/mL | 1.00 (1.00–1.00) | 0.61 |  | 1.00 (1.00–1.00) | 0.62 |
|  |  | Hemoglobin, g/dL | 0.94 (0.86–1.03) | 0.17 |  | 0.84 (0.76–0.93) | <0.001 |
| **Age subgroup** | **Outcome** | **Variable** | **sHR (95% CI)** | **P value** | **Outcome** | **sHR (95% CI)** | **P value** |
| ≥80 years | PC death | Upfront treatment | 0.78 (0.45–1.36) | 0.38 | Non-PC death | 1.17 (0.61–2.21) | 0.64 |
|  |  | Age, years | 1.17 (1.06–1.30) | 0.002 |  | 1.00 (0.91–1.09) | 0.96 |
|  |  | ECOG PS (0-4) | 0.96 (0.69–1.32) | 0.79 |  | 1.45 (1.07–1.97) | 0.02 |
|  |  | Total Gleason score | 1.08 (0.73–1.58) | 0.71 |  | 0.99 (0.68–1.45) | 0.96 |
|  |  | Bone metastases | 0.45 (0.10–2.04) | 0.30 |  | 0.92 (0.28–3.10) | 0.90 |
|  |  | Lymph node metastases | 1.88 (1.08–3.28) | 0.03 |  | 1.05 (0.56–1.96) | 0.88 |
|  |  | Lung metastases | 0.73 (0.32–1.68) | 0.47 |  | 1.64 (0.69–3.87) | 0.26 |
|  |  | Liver metastases | 5.88 (1.30–26.5) | 0.02 |  | 1.00 (0.11–9.33) | 1.00 |
|  |  | EOD (0-4) | 1.85 (1.26–2.71) | 0.002 |  | 0.77 (0.53–1.12) | 0.17 |
|  |  | CHAARTED high volume | 0.91 (0.38–2.21) | 0.84 |  | 1.51 (0.63–3.59) | 0.35 |
|  |  | PSA, ng/mL | 1.00 (1.00–1.00) | 0.38 |  | 1.00 (1.00–1.00) | 0.50 |
|  |  | Hemoglobin, g/dL | 0.96 (0.85–1.07) | 0.45 |  | 0.80 (0.70–0.91) | <0.001 |

Results are presented as subdistribution hazard ratios (sHRs) with 95% confidence intervals (CIs) from multivariable Fine-Gray models. Prostate cancer-specific death and non-prostate cancer death were analyzed as competing events. All models were adjusted for upfront treatment, age, ECOG PS, total Gleason score, bone metastases, lymph node metastases, lung metastases, liver metastases, extent of disease (EOD), CHAARTED high-volume disease, PSA, and hemoglobin.
