# Supplementary material
Source: Research Square preprint supplement (doi:10.21203/rs.3.rs-9724593/v1)

Fig.S1

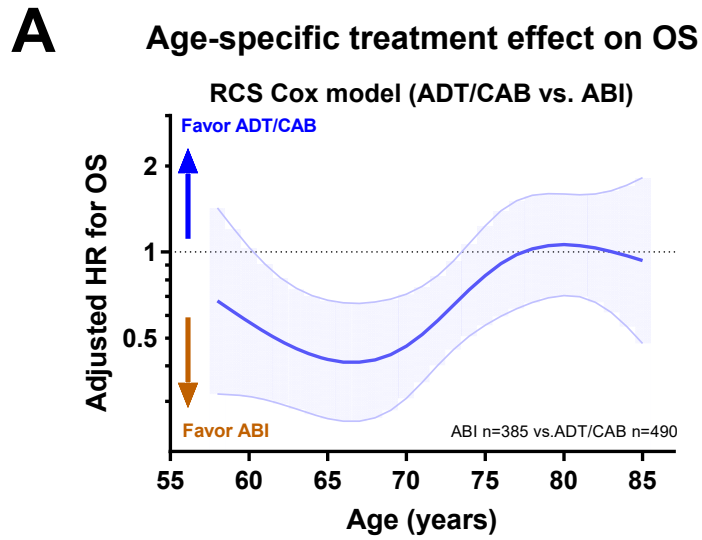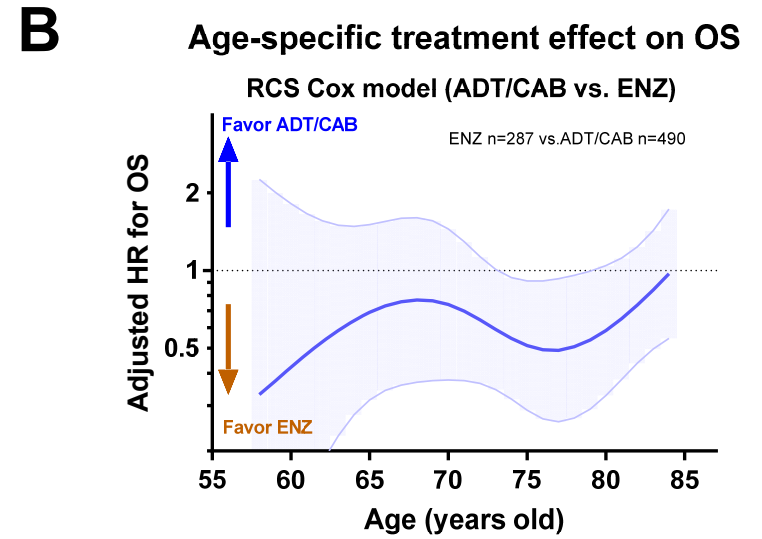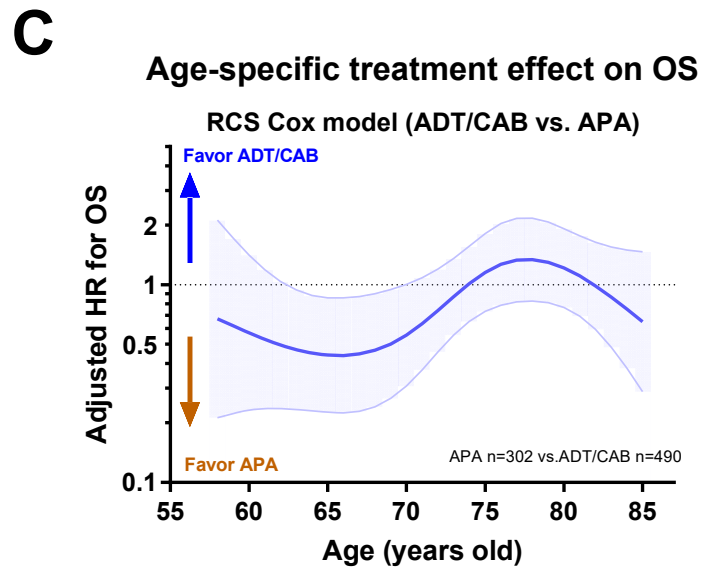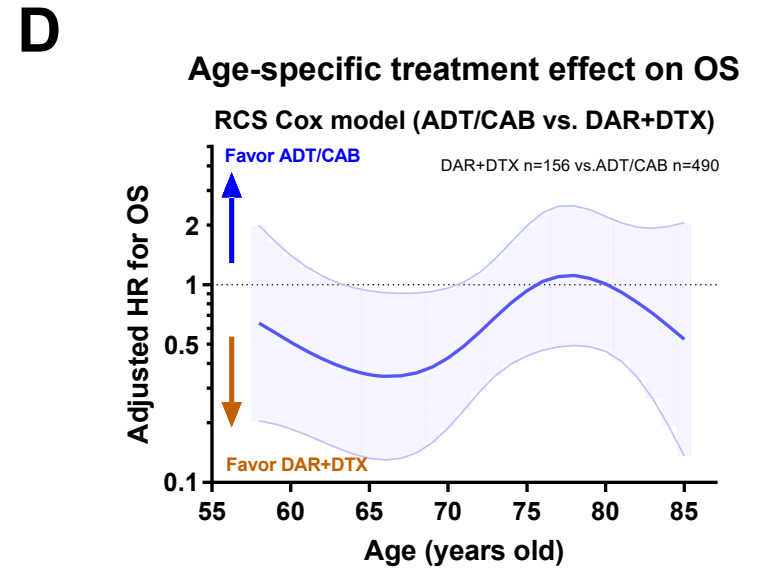

Fig.S2

### Cutoff-based subgroup analysis for OS across sequential age thresholds

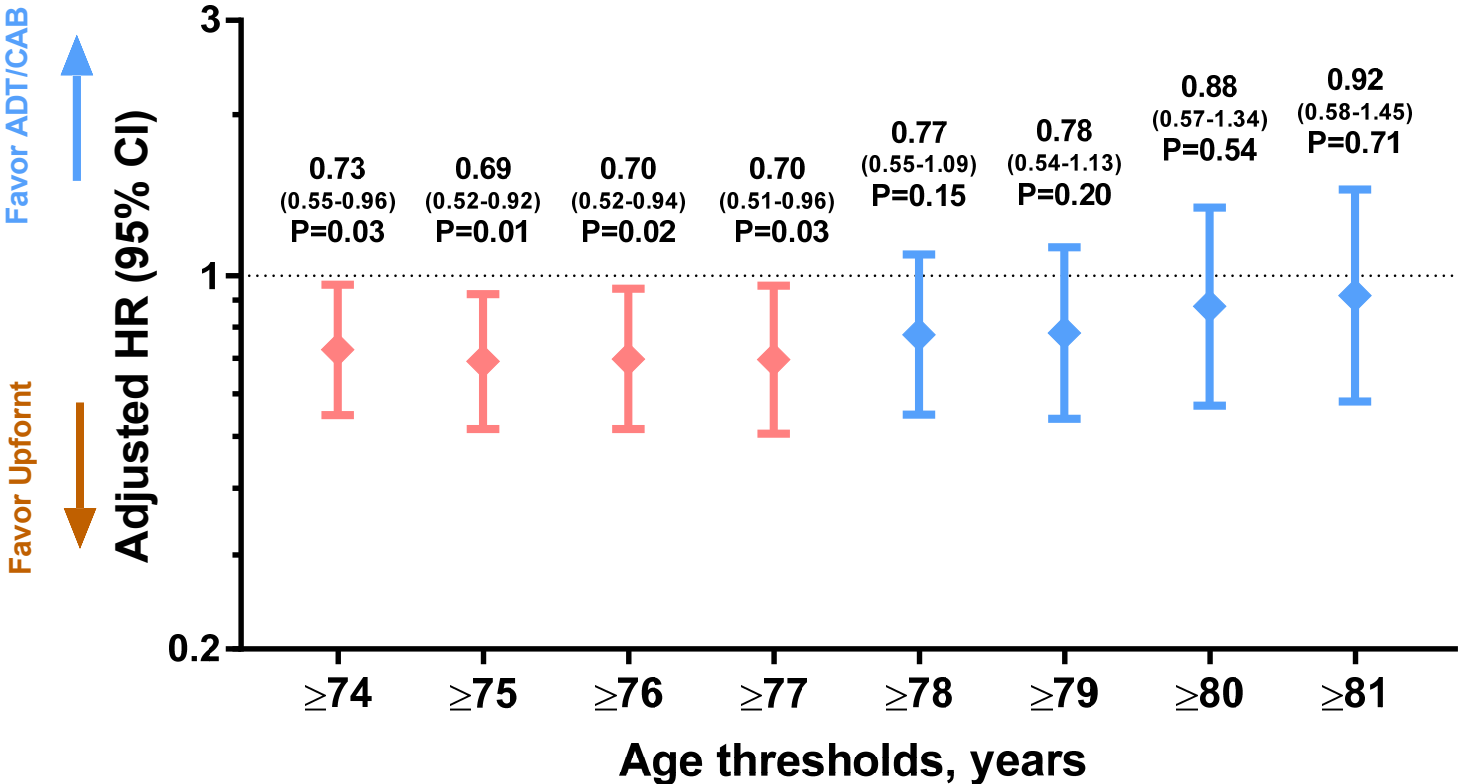

Supplement: Supplementary file 1 [file ac6386be5acedfe93fa94b36.pdf]
